# Supplementary material for: Preparation of new adsorbent-supported Fe/Ni particles for the removal of crystal violet and methylene blue by a heterogeneous Fenton-like reaction
Source: Royal Society of Chemistry journal article supplement (doi:10.1039/c9ra04710g), 2019-01-01
Supplement: c9ra04710g1.pdf [file c9ra04710g1.pdf]

**Supplementary information for:**

**Preparation of a new adsorbent-supported Fe/Ni particles for removal of crystal violet and methylene blue by a heterogeneous Fenton-like reaction**

Jiwei Liu,<sup>ab</sup> Yufeng Du,<sup>a</sup> Wuyang Sun,<sup>a</sup> Quanchao Chang,<sup>a</sup> Changsheng Peng<sup>\*ac</sup>

<sup>a</sup> The Key Lab of Marine Environmental Science and Ecology of Ministry of Education, Ocean University of China, Qingdao 266100, China

<sup>b</sup> School of Environment, Tsinghua University, Beijing, 100084, China

<sup>c</sup> School of Environmental and Chemical Engineering, Zhaoqing University, Zhaoqing, 526061, China

**\*Correspondence author:**

Prof. Changsheng Peng

E-mail: pcs005@ouc.edu.cn

The following is included as additional **Supplementary information** for this paper.

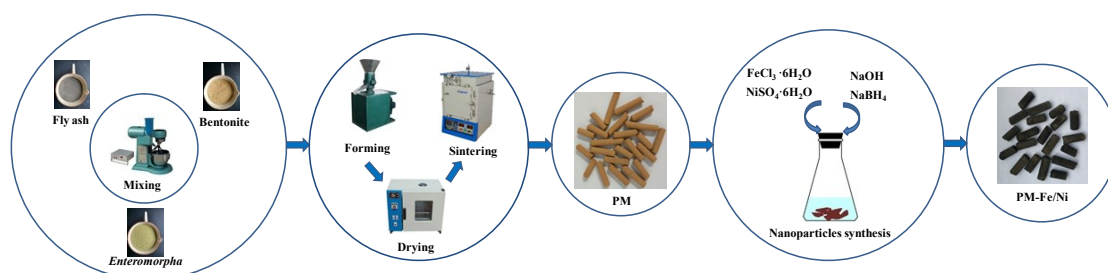

Fig. S1 Schematic diagram of PM-Fe/Ni preparation.

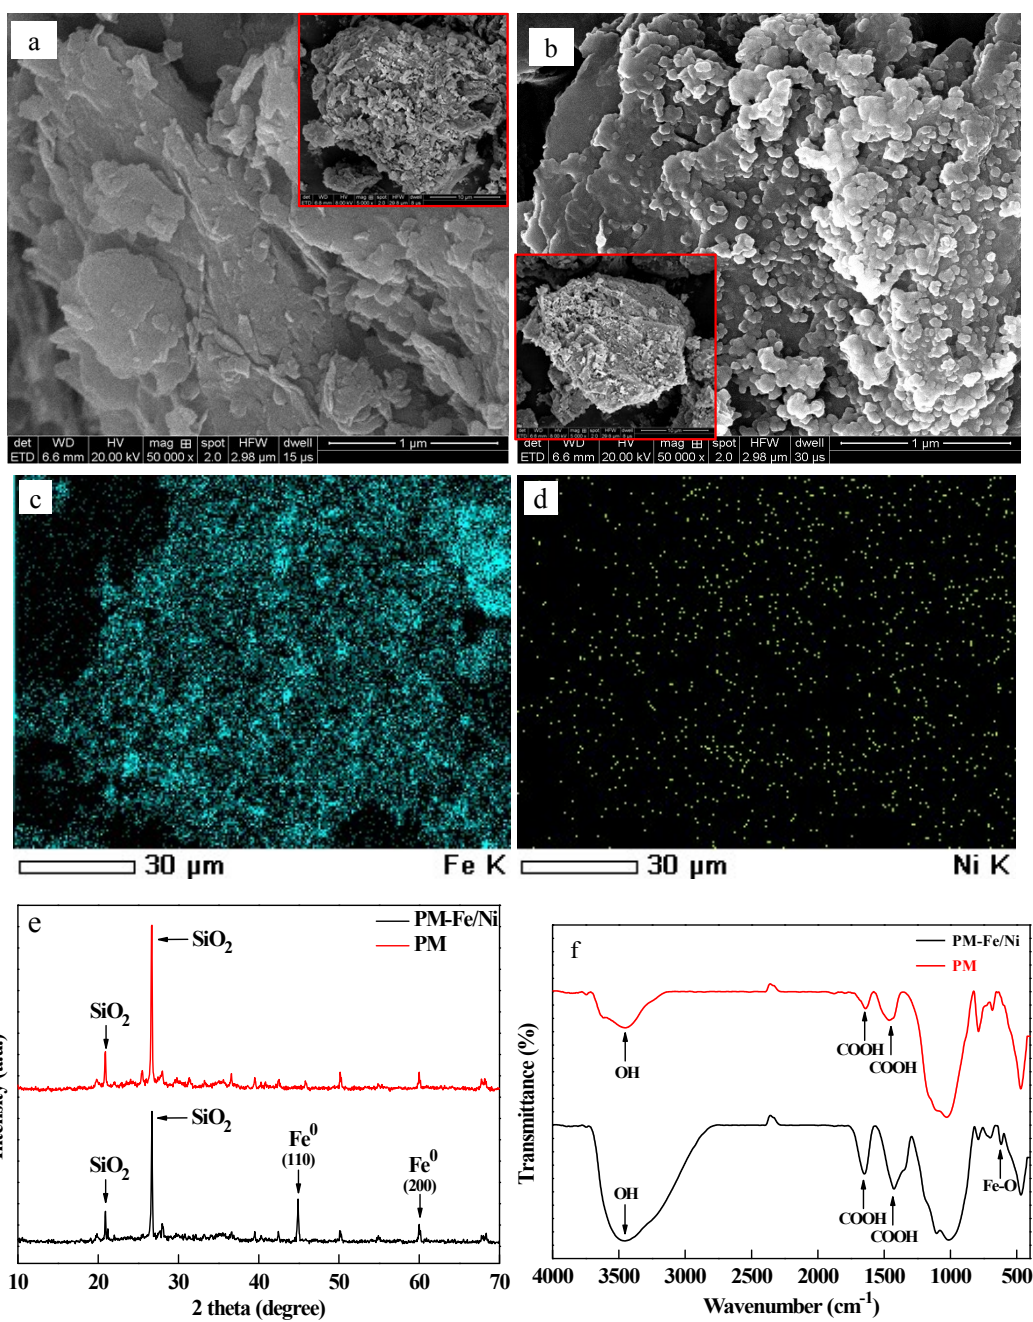

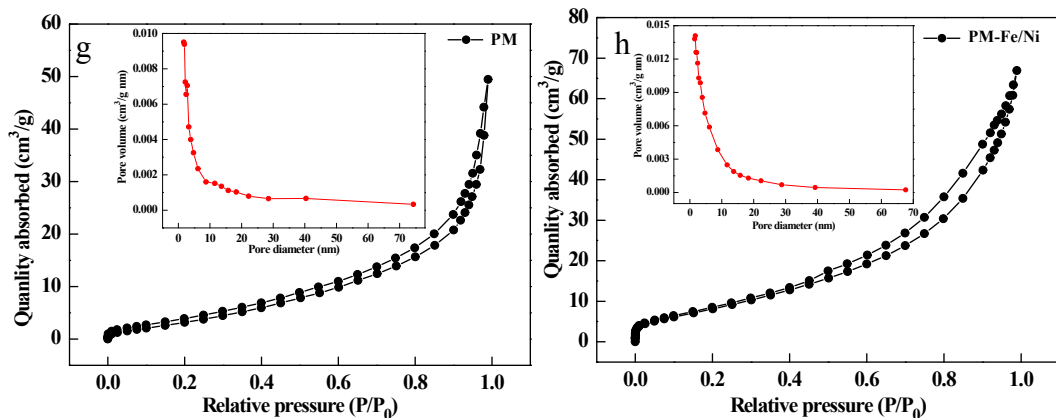

Fig. S2 SEM images of PM(a) and PM -Fe/Ni (b); Elemental mapping images of Fe (c) and Ni (d) in PM -Fe/Ni; XRD images of PM and PM -Fe/Ni (e); FTIR images of PM and PM -Fe/Ni (f); N<sub>2</sub> adsorption-desorption curve and pore size distribution curve of PM (g) and PM -Fe/Ni (h).

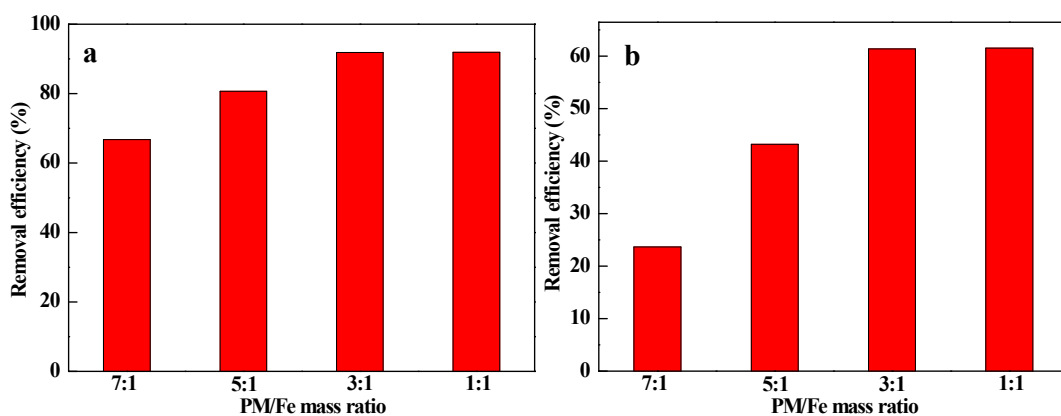

Fig. S3 The effect of PM/Fe mass ratio on the removal of CV (a) and MB (b).

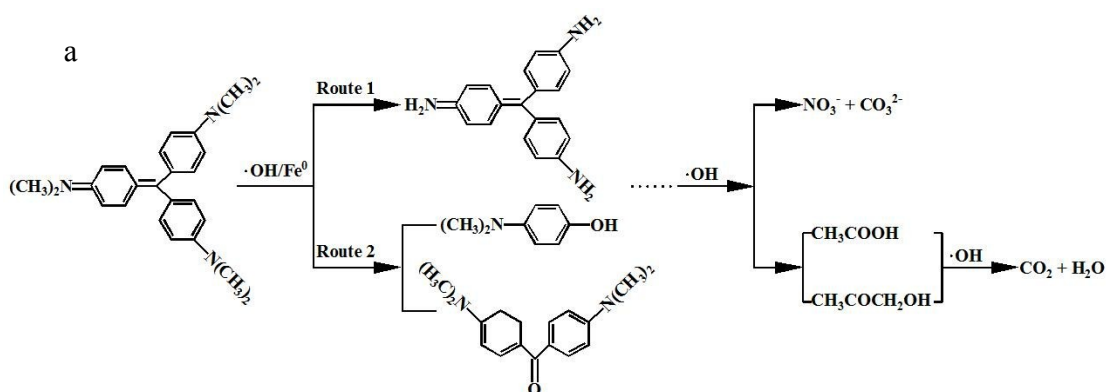

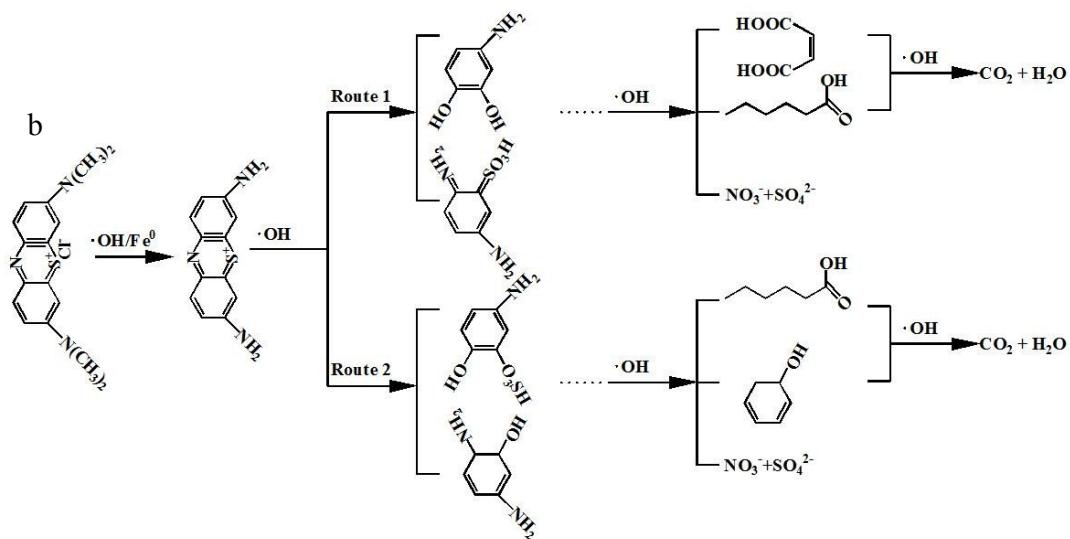

Fig. S4 Possible removal mechanism of CV (a) and MB (b) under Fenton-like processes.

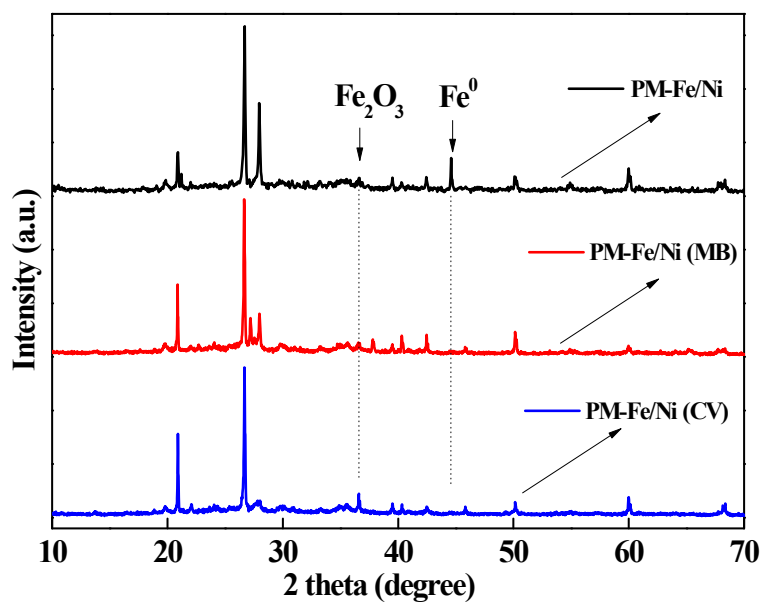

Fig. S5 XRD images of PM -Fe/Ni after CV and MB removal.

**Table S1** Comparative data for the catalytic ability of various materials and PM-Fe/Ni for the removal of CV and MB.

| Catalyst                             | Conditions                                                                                                                                         | R (%)  | Reference |
|--------------------------------------|----------------------------------------------------------------------------------------------------------------------------------------------------|--------|-----------|
| PM-Fe/Ni                             | Dose: 0.2 g; H <sub>2</sub> O <sub>2</sub> : 50 mM; pH: 3;<br>CV: 1000 mg/L (100 mL); 20°C                                                         | 91.86  | This work |
| MMT+Fe(II)                           | Dose: 3 g/L; H <sub>2</sub> O <sub>2</sub> : 50 mM; pH: 3;<br>CV: 012 mM (100 mL); 25°C;<br>Visible light: 1.5×10 <sup>18</sup> photos/s at 366 nm | 99.91  | 1         |
| FeSO <sub>4</sub> ·7H <sub>2</sub> O | Dose: 0.5 mM; H <sub>2</sub> O <sub>2</sub> : 50 mM; pH: 5;<br>CV: 015 mM (100 mL); 25°C                                                           | 97.00  | 2         |
| FeGAC                                | Dose: 1.5 g/L; H <sub>2</sub> O <sub>2</sub> : 7.4 mM; pH: 3;<br>CV: 10 mg/L (100 mL); 25°C                                                        | 71.00  | 3         |
| Fe/AC                                | Dose: 2.5 g/L; Qzone: 4.44 mg/min; 300 mL/min gas flow rate; pH: 7; CV: 400 mg/L (100 mL); 25°C                                                    | 96.00  | 4         |
| PM-Fe/Ni                             | Dose: 0.2 g; H <sub>2</sub> O <sub>2</sub> : 50 mM; pH: 3;<br>MB:1000 mg/L (100 mL); 20°C                                                          | 61.41  | This work |
| Fe(II)Fe(III)-LDHs                   | Dose: 0.1 g/L; H <sub>2</sub> O <sub>2</sub> : 0.01 mm/L; pH: 4;<br>MB: 10 mg/L (100 mL); At ambient temperature                                   | 100.00 | 5         |
| Fe <sub>3</sub> O <sub>4</sub> /BAC  | Dose: 1.2 g/L; H <sub>2</sub> O <sub>2</sub> : 0.23 mol/L; pH: 7;<br>MB: 10 mg/L (100 mL); 30°C                                                    | 98.00  | 6         |
| MPCMS-500                            | Dose: 2 g/L; H <sub>2</sub> O <sub>2</sub> : 16 mmol/L; NH <sub>2</sub> OH: 4 mM; pH: 5;<br>MB: 40 mg/L(10 mL); 30°C                               | 98.00  | 7         |
| PMS-Fe-380                           | Dose: 1 g/L; H <sub>2</sub> O <sub>2</sub> : 1 g/L; pH: 4;<br>MB: 50 mg/L (100 mL); 30°C                                                           | 94.20  | 8         |

## References

1. L. Guz, G. Curutchet, R. M. T. Sánchez and R. Candal, *J. Environ. Chem. Eng.*, 2014, **2**, 2344-2351.
2. H. J. Fan, S. T. Huang, W. H. Chung, J.L. Jan, W. Y. Lin and C .C. Che, *J. Hazard. Mater.*, 2009, **171**, 1032–1044.
3. C. C. Chen, W. C. Chen, M. R. Chiou, S. W. Chen, Y. Y. Chen and H. J. Fan, *J. Hazard. Mater.*, 2011, **196**, 420-425.
4. J. Wu, Hong Gao, S. Yao, L. Chen, Y. W. Gao and H. Zhang, *Sep. Purif. Technol.*, 2015, **147**, 179-185.
5. Q. Wang, S. L. Tian , J. Long and P. Ning, *Catal. Today*, 2014, **224**, 41–48.

6. X. Liu, S. X. Zhang, H. Luo, Y. Y. Zhang, Q. Xu, Z. Y. Zhang , H. Xu and Z. H. Wan, *J. Taiwan Inst. Chem. E.*, 2017, **81**, 265–274.
7. L. C. Zhou, Y. M. Shao, J. R. Liu, Z. F. Ye, H. Zhang, J. J. Ma, Y. Jia, W. J. Gao and Y. F. Li, *ACS Appl. Mater. Interfaces*, 2014, **6**, 7275-7285.
8. G. Q. Zhou, Z. W. Chen, F. Fang, Y. F. He, H. L. Sun and H. X. Shi, *J. Environ. Sci.*, 2015, **35**, 20-26.
